# Supplementary material for: Harnessing the Potential of Halogenated Natural Product Biosynthesis by Mangrove-Derived Actinomycetes
Source: MDPI journal article supplement (doi:10.3390/md11103875), 2013-10-14
Supplement: s2 [file s2]

marinedrugs-11-03875-s001.mol
  corina  11211301463D 1   1.00000     0.00000 
CORINA 3.49 0023  12.04.2013
166174  0  0  0  0  0  0  0  0999 V2000
    8.6550   -6.7383   20.5007 C   0  0  0  0  0  0  0  0  0  0  0  0
    9.3990   -5.5775   20.4141 C   0  0  0  0  0  0  0  0  0  0  0  0
    8.8624   -4.4553   19.7998 C   0  0  0  0  0  0  0  0  0  0  0  0
    7.5795   -4.5020   19.2739 C   0  0  0  0  0  0  0  0  0  0  0  0
    6.8396   -5.6652   19.3631 C   0  0  0  0  0  0  0  0  0  0  0  0
    7.3766   -6.7822   19.9759 C   0  0  0  0  0  0  0  0  0  0  0  0
    9.5921   -3.3121   19.7137 O   0  0  0  0  0  0  0  0  0  0  0  0
    6.5674   -8.0499   20.0714 C   0  0  0  0  0  0  0  0  0  0  0  0
    6.9474   -8.7956   21.3245 C   0  0  0  0  0  0  0  0  0  0  0  0
    7.0074   -8.1211   22.5064 N   0  0  0  0  0  0  0  0  0  0  0  0
    7.3868   -8.9192   23.6912 C   0  0  0  0  0  0  0  0  0  0  0  0
    7.7354   -7.9836   24.8203 C   0  0  0  0  0  0  0  0  0  0  0  0
    8.2018   -8.5065   25.9863 N   0  0  0  0  0  0  0  0  0  0  0  0
    7.6019   -6.7850   24.6915 O   0  0  0  0  0  0  0  0  0  0  0  0
    8.5259   -7.5505   27.0634 C   0  0  0  0  0  0  0  0  0  0  0  0
    9.1399   -6.2861   26.4592 C   0  0  0  0  0  0  0  0  0  0  0  0
    8.0980   -5.4280   25.9900 O   0  0  0  0  0  0  0  0  0  0  0  0
   10.1716   -7.4135   28.9050 N   0  0  0  0  0  0  0  0  0  0  0  0
    9.5145   -8.1933   28.0020 C   0  0  0  0  0  0  0  0  0  0  0  0
    9.7222   -9.3872   27.9538 O   0  0  0  0  0  0  0  0  0  0  0  0
   11.1340   -8.1068   29.7880 C   0  0  0  0  0  0  0  0  0  0  0  0
   12.2800   -7.1735   30.0815 C   0  0  0  0  0  0  0  0  0  0  0  0
   13.4199   -7.6722   30.6299 N   0  0  0  0  0  0  0  0  0  0  0  0
   14.5068   -6.7088   30.8943 C   0  0  0  0  0  0  0  0  0  0  0  0
   12.1868   -5.9905   29.8309 O   0  0  0  0  0  0  0  0  0  0  0  0
   12.7477  -10.3692   27.2335 C   0  0  0  0  0  0  0  0  0  0  0  0
   12.2712   -9.2378   27.8670 C   0  0  0  0  0  0  0  0  0  0  0  0
   11.6524   -9.3427   29.0989 C   0  0  0  0  0  0  0  0  0  0  0  0
   11.5088  -10.5796   29.7000 C   0  0  0  0  0  0  0  0  0  0  0  0
   11.9839  -11.7139   29.0708 C   0  0  0  0  0  0  0  0  0  0  0  0
   12.6052  -11.6114   27.8347 C   0  0  0  0  0  0  0  0  0  0  0  0
   13.0731  -12.7259   27.2135 O   0  0  0  0  0  0  0  0  0  0  0  0
   10.0499   -6.6693   25.2905 C   0  0  0  0  0  0  0  0  0  0  0  0
    6.2133   -9.8086   24.1068 C   0  0  0  0  0  0  0  0  0  0  0  0
    4.9885   -8.9370   24.3916 C   0  0  0  0  0  0  0  0  0  0  0  0
    3.8518   -9.8126   24.9227 C   0  0  0  0  0  0  0  0  0  0  0  0
    2.6759   -8.9757   25.1961 N   0  0  0  0  0  0  0  0  0  0  0  0
    6.8382   -8.8915   18.9037 N   0  0  0  0  0  0  0  0  0  0  0  0
    7.7152   -8.4833   17.9660 C   0  0  0  0  0  0  0  0  0  0  0  0
    8.2782   -7.4157   18.0853 O   0  0  0  0  0  0  0  0  0  0  0  0
    7.9965   -9.3548   16.7691 C   0  0  0  0  0  0  0  0  0  0  0  0
    9.5066   -9.5635   16.6323 C   0  0  0  0  0  0  0  0  0  0  0  0
    9.8926   -9.3967   15.2433 O   0  0  0  0  0  0  0  0  0  0  0  0
    9.8707  -10.9750   17.0971 C   0  0  0  0  0  0  0  0  0  0  0  0
    7.4820   -8.7055   15.5608 N   0  0  0  0  0  0  0  0  0  0  0  0
    6.1904   -8.8622   15.2095 C   0  0  0  0  0  0  0  0  0  0  0  0
    5.6612   -8.1943   13.9665 C   0  0  0  0  0  0  0  0  0  0  0  0
    4.2412   -8.5168   13.8057 N   0  0  0  0  0  0  0  0  0  0  0  0
    5.4539   -9.5408   15.8936 O   0  0  0  0  0  0  0  0  0  0  0  0
    3.8751   -9.6889   13.2500 C   0  0  0  0  0  0  0  0  0  0  0  0
    2.4626   -9.9649   12.9891 C   0  0  0  0  0  0  0  0  0  0  0  0
    2.0869  -11.1724   12.5116 C   0  0  0  0  0  0  0  0  0  0  0  0
    3.0529  -12.2704   12.4568 C   0  0  0  0  0  0  0  0  0  0  0  0
    2.6764  -13.4682   12.0061 C   0  0  0  0  0  0  0  0  0  0  0  0
    3.6711  -14.5989   11.9496 C   0  0  0  0  0  0  0  0  0  0  0  0
    3.1227  -15.7997   12.7232 C   0  0  0  0  0  0  0  0  0  0  0  0
    4.1326  -16.9476   12.6659 C   0  0  0  0  0  0  0  0  0  0  0  0
    3.5843  -18.1483   13.4394 C   0  0  0  0  0  0  0  0  0  0  0  0
    4.5942  -19.2963   13.3821 C   0  0  0  0  0  0  0  0  0  0  0  0
    5.8716  -18.8890   14.1192 C   0  0  0  0  0  0  0  0  0  0  0  0
    3.9947  -20.5366   14.0477 C   0  0  0  0  0  0  0  0  0  0  0  0
    7.1965   -9.9818   21.2813 O   0  0  0  0  0  0  0  0  0  0  0  0
    4.7198  -10.5176   12.9653 O   0  0  0  0  0  0  0  0  0  0  0  0
    5.8290   -6.6787   14.0912 C   0  0  0  0  0  0  0  0  0  0  0  0
   15.8180   -7.4502   30.9366 C   0  0  0  0  0  0  0  0  0  0  0  0
   14.3427   -6.0605   28.4827 C   0  0  0  0  0  0  0  0  0  0  0  0
   14.5453   -5.6778   29.7958 C   0  0  0  0  0  0  0  0  0  0  0  0
   14.7828   -4.3508   30.1028 C   0  0  0  0  0  0  0  0  0  0  0  0
   14.8178   -3.4036   29.0978 C   0  0  0  0  0  0  0  0  0  0  0  0
   14.6148   -3.7850   27.7795 C   0  0  0  0  0  0  0  0  0  0  0  0
   14.3771   -5.1173   27.4740 C   0  0  0  0  0  0  0  0  0  0  0  0
   14.6487   -2.8552   26.7890 O   0  0  0  0  0  0  0  0  0  0  0  0
   16.9787   -6.7367   30.9399 N   0  0  0  0  0  0  0  0  0  0  0  0
   19.3489   -6.6885   30.4211 C   0  0  0  0  0  0  0  0  0  0  0  0
   18.2288   -7.5240   30.9856 C   0  0  0  0  0  0  0  0  0  0  0  0
   18.0654   -8.7950   30.1496 C   0  0  0  0  0  0  0  0  0  0  0  0
   17.7132   -8.4423   28.8104 O   0  0  0  0  0  0  0  0  0  0  0  0
   15.8398   -8.6624   30.9668 O   0  0  0  0  0  0  0  0  0  0  0  0
   19.1803   -5.5096   30.1917 O   0  0  0  0  0  0  0  0  0  0  0  0
   20.5514   -7.2735   30.1727 N   0  0  0  0  0  0  0  0  0  0  0  0
   19.3826   -9.5735   30.1424 C   0  0  0  0  0  0  0  0  0  0  0  0
   11.1862   -9.5903   14.9396 C   0  0  0  0  0  0  0  0  0  0  0  0
   11.6556   -9.4204   13.5177 C   0  0  0  0  0  0  0  0  0  0  0  0
   12.9395  -10.1263   13.3477 N   0  0  0  0  0  0  0  0  0  0  0  0
   13.9100   -9.4746   12.6494 C   0  0  0  0  0  0  0  0  0  0  0  0
   15.2214  -10.1725   12.4009 C   0  0  0  0  0  0  0  0  0  0  0  0
   11.9716   -9.9002   15.8039 O   0  0  0  0  0  0  0  0  0  0  0  0
    9.7391   -9.1680   11.9283 C   0  0  0  0  0  0  0  0  0  0  0  0
    8.8003   -9.6979   11.0644 C   0  0  0  0  0  0  0  0  0  0  0  0
    8.7544  -11.0674   10.8471 C   0  0  0  0  0  0  0  0  0  0  0  0
    9.6517  -11.9012   11.4982 C   0  0  0  0  0  0  0  0  0  0  0  0
   10.5885  -11.3664   12.3612 C   0  0  0  0  0  0  0  0  0  0  0  0
   10.6323  -10.0012   12.5762 C   0  0  0  0  0  0  0  0  0  0  0  0
    7.8315  -11.5911    9.9980 O   0  0  0  0  0  0  0  0  0  0  0  0
   16.3019   -9.1670   12.3352 N   0  0  0  0  0  0  0  0  0  0  0  0
   13.7214   -8.3509   12.2340 O   0  0  0  0  0  0  0  0  0  0  0  0
   17.5669   -9.6445   12.4936 C   0  0  0  0  0  0  0  0  0  0  0  0
   18.7343   -8.6934   12.4537 C   0  0  0  0  0  0  0  0  0  0  0  0
   15.1516  -10.9352   11.0764 C   0  0  0  0  0  0  0  0  0  0  0  0
   17.7531  -10.8304   12.6664 O   0  0  0  0  0  0  0  0  0  0  0  0
   19.9355   -9.4075   12.9314 N   0  0  0  0  0  0  0  0  0  0  0  0
   18.9580   -8.2138   11.0182 C   0  0  0  0  0  0  0  0  0  0  0  0
   17.7525   -7.3893   10.5622 C   0  0  0  0  0  0  0  0  0  0  0  0
   17.5966   -6.1982   11.4082 N   0  0  0  0  0  0  0  0  0  0  0  0
   17.9881   -6.8310    9.1473 C   0  0  0  0  0  0  0  0  0  0  0  0
   17.9452   -5.3718    9.3140 N   0  0  0  0  0  0  0  0  0  0  0  0
   17.7180   -5.0794   10.6308 C   0  0  0  0  0  0  0  0  0  0  0  0
   17.6262   -3.8648   11.0948 N   0  0  0  0  0  0  0  0  0  0  0  0
   20.9385   -8.6483   13.4486 C   0  0  0  0  0  0  0  0  0  0  0  0
   22.1772   -9.3302   13.9715 C   0  0  0  0  0  0  0  0  0  0  0  0
   22.9839   -8.3410   14.7158 N   0  0  0  0  0  0  0  0  0  0  0  0
   23.7191   -8.8230   15.7579 C   0  0  0  0  0  0  0  0  0  0  0  0
   24.5674   -7.8636   16.5524 C   0  0  0  0  0  0  0  0  0  0  0  0
   20.8381   -7.4403   13.4883 O   0  0  0  0  0  0  0  0  0  0  0  0
   25.0258   -8.5336   17.7841 N   0  0  0  0  0  0  0  0  0  0  0  0
   25.2833   -7.7356   18.8556 C   0  0  0  0  0  0  0  0  0  0  0  0
   23.6907  -10.0020   16.0406 O   0  0  0  0  0  0  0  0  0  0  0  0
   25.7555   -6.2291   15.0763 C   0  0  0  0  0  0  0  0  0  0  0  0
   26.8488   -5.8437   14.3228 C   0  0  0  0  0  0  0  0  0  0  0  0
   27.9519   -6.6802   14.2244 C   0  0  0  0  0  0  0  0  0  0  0  0
   27.9539   -7.9018   14.8832 C   0  0  0  0  0  0  0  0  0  0  0  0
   26.8578   -8.2820   15.6353 C   0  0  0  0  0  0  0  0  0  0  0  0
   25.7604   -7.4466   15.7315 C   0  0  0  0  0  0  0  0  0  0  0  0
   25.7596   -8.3614   20.1410 C   0  0  0  0  0  0  0  0  0  0  0  0
   25.7103   -7.3443   21.2118 N   0  0  0  0  0  0  0  0  0  0  0  0
   25.1309   -6.5349   18.7772 O   0  0  0  0  0  0  0  0  0  0  0  0
   25.6182   -7.8170   22.4869 C   0  0  0  0  0  0  0  0  0  0  0  0
   25.5628   -6.8344   23.6279 C   0  0  0  0  0  0  0  0  0  0  0  0
   25.2253   -7.5604   24.8674 N   0  0  0  0  0  0  0  0  0  0  0  0
   24.6562   -6.8345   25.8675 C   0  0  0  0  0  0  0  0  0  0  0  0
   24.2914   -7.5227   27.1575 C   0  0  0  0  0  0  0  0  0  0  0  0
   25.5811   -9.0104   22.6998 O   0  0  0  0  0  0  0  0  0  0  0  0
   27.1086   -4.8996   23.2674 C   0  0  0  0  0  0  0  0  0  0  0  0
   28.3374   -4.2844   23.4094 C   0  0  0  0  0  0  0  0  0  0  0  0
   29.3668   -4.9382   24.0709 C   0  0  0  0  0  0  0  0  0  0  0  0
   29.1593   -6.2086   24.5882 C   0  0  0  0  0  0  0  0  0  0  0  0
   27.9287   -6.8195   24.4435 C   0  0  0  0  0  0  0  0  0  0  0  0
   26.9044   -6.1658   23.7838 C   0  0  0  0  0  0  0  0  0  0  0  0
   24.4454   -5.6489   25.7228 O   0  0  0  0  0  0  0  0  0  0  0  0
   27.1973   -8.8557   19.9689 C   0  0  0  0  0  0  0  0  0  0  0  0
   28.0216   -7.7772   19.5222 O   0  0  0  0  0  0  0  0  0  0  0  0
   21.6071   -6.4065   29.6226 C   0  0  0  0  0  0  0  0  0  0  0  0
   22.5434   -7.2503   28.7967 C   0  0  0  0  0  0  0  0  0  0  0  0
   23.4022   -6.6354   27.9360 N   0  0  0  0  0  0  0  0  0  0  0  0
   22.5329   -8.4589   28.8969 O   0  0  0  0  0  0  0  0  0  0  0  0
   22.3815   -5.7520   30.7684 C   0  0  0  0  0  0  0  0  0  0  0  0
   21.4521   -4.8148   31.5422 C   0  0  0  0  0  0  0  0  0  0  0  0
   22.2265   -4.1603   32.6880 C   0  0  0  0  0  0  0  0  0  0  0  0
   21.3366   -3.2630   33.4290 N   0  0  0  0  0  0  0  0  0  0  0  0
   21.8045   -2.5734   34.4882 C   0  0  0  0  0  0  0  0  0  0  0  0
   20.9858   -1.7478   35.1699 N   0  0  0  0  0  0  0  0  0  0  0  0
   22.9652   -2.6960   34.8288 O   0  0  0  0  0  0  0  0  0  0  0  0
   25.5607   -7.8105   27.9619 C   0  0  0  0  0  0  0  0  0  0  0  0
   26.4107   -8.8445   27.2208 C   0  0  0  0  0  0  0  0  0  0  0  0
   27.7265   -9.0997   27.9774 C   0  0  0  0  0  0  0  0  0  0  0  0
   27.6816  -10.5263   28.3261 N   0  0  0  0  0  0  0  0  0  0  0  0
   25.7340  -10.1486   27.2061 N   0  0  0  0  0  0  0  0  0  0  0  0
   26.5157  -11.0645   27.8550 C   0  0  0  0  0  0  0  0  0  0  0  0
   26.1853  -12.3161   28.0074 N   0  0  0  0  0  0  0  0  0  0  0  0
   30.5766   -4.3353   24.2115 O   0  0  0  0  0  0  0  0  0  0  0  0
   29.3312   -8.9517   14.7625 Cl  0  0  0  0  0  0  0  0  0  0  0  0
   29.0281   -6.3040   13.4838 O   0  0  0  0  0  0  0  0  0  0  0  0
   26.8417   -4.3150   13.5000 Cl  0  0  0  0  0  0  0  0  0  0  0  0
    5.4038   -6.0187   12.8048 C   0  0  0  0  0  0  0  0  0  0  0  0
    4.9293   -6.6822   11.9135 O   0  0  0  0  0  0  0  0  0  0  0  0
    5.5522   -4.6937   12.6493 O   0  0  0  0  0  0  0  0  0  0  0  0
  2  3  2  0      
  4  5  2  0      
  6  1  2  0      
  3  7  1  0      
  8  6  1  0      
  8  9  1  0      
  9 10  1  0      
 10 11  1  0      
 11 12  1  0      
 12 13  1  0      
 12 14  2  0      
 15 16  1  0      
 16 17  1  0      
 18 19  1  0      
 19 15  1  0      
 15 13  1  0      
 19 20  2  0      
 18 21  1  0      
 21 22  1  0      
 22 23  1  0      
 23 24  1  0      
 22 25  2  0      
 26 27  2  0      
 27 28  1  0      
 28 29  2  0      
 29 30  1  0      
 30 31  2  0      
 31 26  1  0      
 21 28  1  0      
 31 32  1  0      
 16 33  1  0      
  1  2  1  0      
  3  4  1  0      
  6  5  1  0      
 34 35  1  0      
 35 36  1  0      
 36 37  1  0      
 11 34  1  0      
  8 38  1  0      
 38 39  1  0      
 39 40  2  0      
 39 41  1  0      
 41 42  1  0      
 42 43  1  0      
 42 44  1  0      
 41 45  1  0      
 45 46  1  0      
 46 47  1  0      
 47 48  1  0      
 46 49  2  0      
 48 50  1  0      
 50 51  1  0      
 51 52  2  0      
 52 53  1  0      
 53 54  2  0      
 54 55  1  0      
 55 56  1  0      
 56 57  1  0      
 57 58  1  0      
 58 59  1  0      
 59 60  1  0      
 59 61  1  0      
  9 62  2  0      
 50 63  2  0      
 47 64  1  0      
 24 65  1  0      
 67 68  2  0      
 69 70  2  0      
 71 66  2  0      
 66 67  1  0      
 68 69  1  0      
 71 70  1  0      
 24 67  1  0      
 70 72  1  0      
 65 73  1  0      
 74 75  1  0      
 75 76  1  0      
 76 77  1  0      
 75 73  1  0      
 65 78  2  0      
 74 79  2  0      
 74 80  1  0      
 76 81  1  0      
 43 82  1  0      
 82 83  1  0      
 83 84  1  0      
 84 85  1  0      
 85 86  1  0      
 82 87  2  0      
 89 90  2  0      
 91 92  2  0      
 93 88  2  0      
 89 88  1  0      
 93 92  1  0      
 90 91  1  0      
 90 94  1  0      
 86 95  1  0      
 83 93  1  0      
 85 96  2  0      
 95 97  1  0      
 97 98  1  0      
 86 99  1  0      
 97100  2  0      
 98101  1  0      
 98102  1  0      
102103  1  0      
103104  1  0      
103105  1  0      
105106  1  0      
106107  1  0      
104107  1  0      
107108  2  0      
101109  1  0      
109110  1  0      
110111  1  0      
111112  1  0      
112113  1  0      
109114  2  0      
113115  1  0      
115116  1  0      
112117  2  0      
119120  2  0      
121122  2  0      
123118  2  0      
118119  1  0      
120121  1  0      
123122  1  0      
113123  1  0      
116124  1  0      
124125  1  0      
116126  2  0      
125127  1  0      
127128  1  0      
128129  1  0      
129130  1  0      
130131  1  0      
127132  2  0      
134135  2  0      
136137  2  0      
138133  2  0      
133134  1  0      
135136  1  0      
138137  1  0      
128138  1  0      
130139  2  0      
124140  1  0      
140141  1  0      
 80142  1  0      
142143  1  0      
131144  1  0      
144143  1  0      
143145  2  0      
142146  1  0      
146147  1  0      
147148  1  0      
148149  1  0      
149150  1  0      
150151  1  0      
150152  2  0      
131153  1  0      
153154  1  0      
154155  1  0      
155156  1  0      
154157  1  0      
157158  1  0      
156158  1  0      
158159  2  0      
135160  1  0      
121161  1  0      
120162  1  0      
119163  1  0      
164165  2  0      
164166  1  0      
 64164  1  0      
M  STY  1   1 SUP
M  SLB  1   1   1
M  SAL   1  3 164 165 166
M  SBL   1  1 174
M  SMT   1 COOH
M  SBV   1174  -10.6321    7.3587
M  END
$$$$
