# Supplementary material for: Harnessing the Potential of Halogenated Natural Product Biosynthesis by Mangrove-Derived Actinomycetes
Source: MDPI journal article supplement (doi:10.3390/md11103875), 2013-10-14
Supplement: s3 [file s3]

marinedrugs-11-03875-s001.mol
  ChemDraw11081308402D

166174  0  0  0  0  0  0  0  0999 V2000
   -2.6442    0.2618    0.0000 C   0  0  0  0  0  0  0  0  0  0  0  0
   -2.6442   -0.5632    0.0000 C   0  0  0  0  0  0  0  0  0  0  0  0
   -1.9298   -0.9757    0.0000 C   0  0  0  0  0  0  0  0  0  0  0  0
   -1.2153   -0.5632    0.0000 C   0  0  0  0  0  0  0  0  0  0  0  0
   -1.2153    0.2618    0.0000 C   0  0  0  0  0  0  0  0  0  0  0  0
   -1.9298    0.6743    0.0000 C   0  0  0  0  0  0  0  0  0  0  0  0
   -1.9298   -1.8007    0.0000 O   0  0  0  0  0  0  0  0  0  0  0  0
   -1.9298    1.3137    0.0000 C   0  0  0  0  0  0  0  0  0  0  0  0
   -1.2153    1.7262    0.0000 C   0  0  0  0  0  0  0  0  0  0  0  0
   -0.5008    1.3137    0.0000 N   0  0  0  0  0  0  0  0  0  0  0  0
    0.2136    1.7262    0.0000 C   0  0  0  0  0  0  0  0  0  0  0  0
    0.9281    1.3137    0.0000 C   0  0  0  0  0  0  0  0  0  0  0  0
    1.6426    1.7262    0.0000 N   0  0  0  0  0  0  0  0  0  0  0  0
    0.9281    0.4887    0.0000 O   0  0  0  0  0  0  0  0  0  0  0  0
    2.4810    1.2518    0.0000 C   0  0  0  0  0  0  0  0  0  0  0  0
    2.4810    0.4268    0.0000 C   0  0  0  0  0  0  0  0  0  0  0  0
    3.1954    0.0143    0.0000 O   0  0  0  0  0  0  0  0  0  0  0  0
    3.9099    1.2518    0.0000 N   0  0  0  0  0  0  0  0  0  0  0  0
    3.1954    1.6643    0.0000 C   0  0  0  0  0  0  0  0  0  0  0  0
    3.1954    2.4893    0.0000 O   0  0  0  0  0  0  0  0  0  0  0  0
    4.6244    1.6643    0.0000 C   0  0  0  0  0  0  0  0  0  0  0  0
    5.3388    1.2518    0.0000 C   0  0  0  0  0  0  0  0  0  0  0  0
    6.0533    1.6643    0.0000 N   0  0  0  0  0  0  0  0  0  0  0  0
    6.7678    1.2518    0.0000 C   0  0  0  0  0  0  0  0  0  0  0  0
    5.3388    0.4268    0.0000 O   0  0  0  0  0  0  0  0  0  0  0  0
    3.9041    3.4999    0.0000 C   0  0  0  0  0  0  0  0  0  0  0  0
    3.9041    2.6749    0.0000 C   0  0  0  0  0  0  0  0  0  0  0  0
    4.6186    2.2624    0.0000 C   0  0  0  0  0  0  0  0  0  0  0  0
    5.3330    2.6749    0.0000 C   0  0  0  0  0  0  0  0  0  0  0  0
    5.3330    3.4999    0.0000 C   0  0  0  0  0  0  0  0  0  0  0  0
    4.6186    3.9124    0.0000 C   0  0  0  0  0  0  0  0  0  0  0  0
    4.6186    4.7374    0.0000 O   0  0  0  0  0  0  0  0  0  0  0  0
    1.7665    0.0143    0.0000 C   0  0  0  0  0  0  0  0  0  0  0  0
    0.2152    2.4068    0.0000 C   0  0  0  0  0  0  0  0  0  0  0  0
   -0.4992    2.8193    0.0000 C   0  0  0  0  0  0  0  0  0  0  0  0
   -0.4992    3.6443    0.0000 C   0  0  0  0  0  0  0  0  0  0  0  0
    0.2152    4.0568    0.0000 N   0  0  0  0  0  0  0  0  0  0  0  0
   -2.6442    1.7262    0.0000 N   0  0  0  0  0  0  0  0  0  0  0  0
   -3.3587    1.3137    0.0000 C   0  0  0  0  0  0  0  0  0  0  0  0
   -3.3587    0.4887    0.0000 O   0  0  0  0  0  0  0  0  0  0  0  0
   -4.0732    1.7262    0.0000 C   0  0  0  0  0  0  0  0  0  0  0  0
   -4.7877    1.3137    0.0000 C   0  0  0  0  0  0  0  0  0  0  0  0
   -5.5021    1.7262    0.0000 O   0  0  0  0  0  0  0  0  0  0  0  0
   -4.7877    0.4887    0.0000 C   0  0  0  0  0  0  0  0  0  0  0  0
   -4.0732    2.5512    0.0000 N   0  0  0  0  0  0  0  0  0  0  0  0
   -4.7877    2.9864    0.0000 C   0  0  0  0  0  0  0  0  0  0  0  0
   -4.7877    3.7887    0.0000 C   0  0  0  0  0  0  0  0  0  0  0  0
   -4.0732    4.2012    0.0000 N   0  0  0  0  0  0  0  0  0  0  0  0
   -5.5021    2.5739    0.0000 O   0  0  0  0  0  0  0  0  0  0  0  0
   -4.0732    5.0262    0.0000 C   0  0  0  0  0  0  0  0  0  0  0  0
   -3.3587    5.4387    0.0000 C   0  0  0  0  0  0  0  0  0  0  0  0
   -2.5337    5.4387    0.0000 C   0  0  0  0  0  0  0  0  0  0  0  0
   -1.8192    5.0262    0.0000 C   0  0  0  0  0  0  0  0  0  0  0  0
   -1.1048    5.4387    0.0000 C   0  0  0  0  0  0  0  0  0  0  0  0
   -0.3903    5.0262    0.0000 C   0  0  0  0  0  0  0  0  0  0  0  0
    0.3242    5.4387    0.0000 C   0  0  0  0  0  0  0  0  0  0  0  0
    0.3242    6.2637    0.0000 C   0  0  0  0  0  0  0  0  0  0  0  0
    1.0386    6.6762    0.0000 C   0  0  0  0  0  0  0  0  0  0  0  0
    1.7531    6.2637    0.0000 C   0  0  0  0  0  0  0  0  0  0  0  0
    1.7531    5.4387    0.0000 C   0  0  0  0  0  0  0  0  0  0  0  0
    2.4676    6.6762    0.0000 C   0  0  0  0  0  0  0  0  0  0  0  0
   -1.2153    2.5512    0.0000 O   0  0  0  0  0  0  0  0  0  0  0  0
   -4.7877    5.4387    0.0000 O   0  0  0  0  0  0  0  0  0  0  0  0
   -5.5021    4.2012    0.0000 C   0  0  0  0  0  0  0  0  0  0  0  0
    6.7678    0.4268    0.0000 C   0  0  0  0  0  0  0  0  0  0  0  0
    7.2675    2.3586    0.0000 C   0  0  0  0  0  0  0  0  0  0  0  0
    7.2675    1.5336    0.0000 C   0  0  0  0  0  0  0  0  0  0  0  0
    7.9820    1.1211    0.0000 C   0  0  0  0  0  0  0  0  0  0  0  0
    8.6964    1.5336    0.0000 C   0  0  0  0  0  0  0  0  0  0  0  0
    8.6964    2.3586    0.0000 C   0  0  0  0  0  0  0  0  0  0  0  0
    7.9820    2.7711    0.0000 C   0  0  0  0  0  0  0  0  0  0  0  0
    9.4109    2.7711    0.0000 O   0  0  0  0  0  0  0  0  0  0  0  0
    7.4823    0.0143    0.0000 N   0  0  0  0  0  0  0  0  0  0  0  0
    6.7791   -1.0161    0.0000 C   0  0  0  0  0  0  0  0  0  0  0  0
    7.4936   -0.6036    0.0000 C   0  0  0  0  0  0  0  0  0  0  0  0
    8.2080   -1.0161    0.0000 C   0  0  0  0  0  0  0  0  0  0  0  0
    8.9225   -0.6036    0.0000 O   0  0  0  0  0  0  0  0  0  0  0  0
    6.0533    0.0143    0.0000 O   0  0  0  0  0  0  0  0  0  0  0  0
    6.0646   -0.6036    0.0000 O   0  0  0  0  0  0  0  0  0  0  0  0
    6.7791   -1.8411    0.0000 N   0  0  0  0  0  0  0  0  0  0  0  0
    8.2080   -1.8411    0.0000 C   0  0  0  0  0  0  0  0  0  0  0  0
   -6.2166    1.3137    0.0000 C   0  0  0  0  0  0  0  0  0  0  0  0
   -6.2166    0.4887    0.0000 C   0  0  0  0  0  0  0  0  0  0  0  0
   -5.5070   -0.0067    0.0000 N   0  0  0  0  0  0  0  0  0  0  0  0
   -6.1490   -0.6487    0.0000 C   0  0  0  0  0  0  0  0  0  0  0  0
   -5.6237   -1.1740    0.0000 C   0  0  0  0  0  0  0  0  0  0  0  0
   -6.9311    1.7262    0.0000 O   0  0  0  0  0  0  0  0  0  0  0  0
   -7.3502    1.2262    0.0000 C   0  0  0  0  0  0  0  0  0  0  0  0
   -8.1752    1.2241    0.0000 C   0  0  0  0  0  0  0  0  0  0  0  0
   -8.5859    0.5085    0.0000 C   0  0  0  0  0  0  0  0  0  0  0  0
   -8.1716   -0.2049    0.0000 C   0  0  0  0  0  0  0  0  0  0  0  0
   -7.3466   -0.2028    0.0000 C   0  0  0  0  0  0  0  0  0  0  0  0
   -6.9359    0.5127    0.0000 C   0  0  0  0  0  0  0  0  0  0  0  0
   -9.4109    0.5085    0.0000 O   0  0  0  0  0  0  0  0  0  0  0  0
   -6.1782   -1.7285    0.0000 N   0  0  0  0  0  0  0  0  0  0  0  0
   -6.9740   -0.6487    0.0000 O   0  0  0  0  0  0  0  0  0  0  0  0
   -5.5949   -2.3119    0.0000 C   0  0  0  0  0  0  0  0  0  0  0  0
   -6.1782   -2.8952    0.0000 C   0  0  0  0  0  0  0  0  0  0  0  0
   -4.7987   -1.1740    0.0000 C   0  0  0  0  0  0  0  0  0  0  0  0
   -4.7699   -2.3119    0.0000 O   0  0  0  0  0  0  0  0  0  0  0  0
   -5.5949   -3.4786    0.0000 N   0  0  0  0  0  0  0  0  0  0  0  0
   -7.0537   -2.6332    0.0000 C   0  0  0  0  0  0  0  0  0  0  0  0
   -7.4331   -3.3336    0.0000 C   0  0  0  0  0  0  0  0  0  0  0  0
   -7.2288   -4.0048    0.0000 N   0  0  0  0  0  0  0  0  0  0  0  0
   -8.2794   -3.0417    0.0000 C   0  0  0  0  0  0  0  0  0  0  0  0
   -8.9950   -4.0619    0.0000 N   0  0  0  0  0  0  0  0  0  0  0  0
   -8.1335   -4.4425    0.0000 C   0  0  0  0  0  0  0  0  0  0  0  0
   -8.4940   -5.2713    0.0000 N   0  0  0  0  0  0  0  0  0  0  0  0
   -4.7699   -3.4786    0.0000 C   0  0  0  0  0  0  0  0  0  0  0  0
   -4.0554   -3.0661    0.0000 C   0  0  0  0  0  0  0  0  0  0  0  0
   -3.3409   -3.4786    0.0000 N   0  0  0  0  0  0  0  0  0  0  0  0
   -2.6264   -3.0661    0.0000 C   0  0  0  0  0  0  0  0  0  0  0  0
   -1.9120   -3.4786    0.0000 C   0  0  0  0  0  0  0  0  0  0  0  0
   -4.3574   -4.1931    0.0000 O   0  0  0  0  0  0  0  0  0  0  0  0
   -1.1975   -3.0661    0.0000 N   0  0  0  0  0  0  0  0  0  0  0  0
   -0.4830   -3.4786    0.0000 C   0  0  0  0  0  0  0  0  0  0  0  0
   -2.6264   -2.2411    0.0000 O   0  0  0  0  0  0  0  0  0  0  0  0
   -2.6028   -4.6137    0.0000 C   0  0  0  0  0  0  0  0  0  0  0  0
   -2.6028   -5.4387    0.0000 C   0  0  0  0  0  0  0  0  0  0  0  0
   -1.8883   -5.8512    0.0000 C   0  0  0  0  0  0  0  0  0  0  0  0
   -1.1739   -5.4387    0.0000 C   0  0  0  0  0  0  0  0  0  0  0  0
   -1.1739   -4.6137    0.0000 C   0  0  0  0  0  0  0  0  0  0  0  0
   -1.8883   -4.2012    0.0000 C   0  0  0  0  0  0  0  0  0  0  0  0
    0.2314   -3.0661    0.0000 C   0  0  0  0  0  0  0  0  0  0  0  0
    0.9459   -3.4786    0.0000 N   0  0  0  0  0  0  0  0  0  0  0  0
   -0.4830   -4.3036    0.0000 O   0  0  0  0  0  0  0  0  0  0  0  0
    1.6604   -3.0661    0.0000 C   0  0  0  0  0  0  0  0  0  0  0  0
    2.3748   -3.4786    0.0000 C   0  0  0  0  0  0  0  0  0  0  0  0
    3.0893   -3.0661    0.0000 N   0  0  0  0  0  0  0  0  0  0  0  0
    3.8038   -3.4786    0.0000 C   0  0  0  0  0  0  0  0  0  0  0  0
    4.5183   -3.0661    0.0000 C   0  0  0  0  0  0  0  0  0  0  0  0
    1.6604   -2.2411    0.0000 O   0  0  0  0  0  0  0  0  0  0  0  0
    1.7162   -4.6137    0.0000 C   0  0  0  0  0  0  0  0  0  0  0  0
    1.7162   -5.4387    0.0000 C   0  0  0  0  0  0  0  0  0  0  0  0
    2.4307   -5.8512    0.0000 C   0  0  0  0  0  0  0  0  0  0  0  0
    3.1452   -5.4387    0.0000 C   0  0  0  0  0  0  0  0  0  0  0  0
    3.1452   -4.6137    0.0000 C   0  0  0  0  0  0  0  0  0  0  0  0
    2.4307   -4.2012    0.0000 C   0  0  0  0  0  0  0  0  0  0  0  0
    3.8038   -4.3036    0.0000 O   0  0  0  0  0  0  0  0  0  0  0  0
    0.2128   -2.4872    0.0000 C   0  0  0  0  0  0  0  0  0  0  0  0
    0.9273   -2.1039    0.0000 O   0  0  0  0  0  0  0  0  0  0  0  0
    6.1522   -2.1660    0.0000 C   0  0  0  0  0  0  0  0  0  0  0  0
    6.1661   -2.9834    0.0000 C   0  0  0  0  0  0  0  0  0  0  0  0
    4.6778   -2.4872    0.0000 N   0  0  0  0  0  0  0  0  0  0  0  0
    6.5786   -3.6978    0.0000 O   0  0  0  0  0  0  0  0  0  0  0  0
    5.7397   -1.4516    0.0000 C   0  0  0  0  0  0  0  0  0  0  0  0
    5.0252   -1.8641    0.0000 C   0  0  0  0  0  0  0  0  0  0  0  0
    4.3107   -1.4516    0.0000 C   0  0  0  0  0  0  0  0  0  0  0  0
    3.5963   -1.8641    0.0000 N   0  0  0  0  0  0  0  0  0  0  0  0
    2.8818   -1.4516    0.0000 C   0  0  0  0  0  0  0  0  0  0  0  0
    2.1673   -1.8641    0.0000 N   0  0  0  0  0  0  0  0  0  0  0  0
    2.8818   -0.6266    0.0000 O   0  0  0  0  0  0  0  0  0  0  0  0
    5.2327   -3.4786    0.0000 C   0  0  0  0  0  0  0  0  0  0  0  0
    5.4463   -4.2755    0.0000 C   0  0  0  0  0  0  0  0  0  0  0  0
    4.8629   -4.8588    0.0000 C   0  0  0  0  0  0  0  0  0  0  0  0
    5.4463   -5.4422    0.0000 N   0  0  0  0  0  0  0  0  0  0  0  0
    6.2431   -4.4890    0.0000 N   0  0  0  0  0  0  0  0  0  0  0  0
    6.0296   -5.2859    0.0000 C   0  0  0  0  0  0  0  0  0  0  0  0
    6.7441   -5.6984    0.0000 N   0  0  0  0  0  0  0  0  0  0  0  0
    2.4307   -6.6762    0.0000 O   0  0  0  0  0  0  0  0  0  0  0  0
   -0.4594   -5.8512    0.0000 Cl  0  0  0  0  0  0  0  0  0  0  0  0
   -1.8883   -6.6762    0.0000 O   0  0  0  0  0  0  0  0  0  0  0  0
   -3.3173   -5.8512    0.0000 Cl  0  0  0  0  0  0  0  0  0  0  0  0
   -5.9164    4.2023    0.0000 C   0  0  0  0  0  0  0  0  0  0  0  0
   -5.4196    5.0627    0.0000 O   0  0  0  0  0  0  0  0  0  0  0  0
   -5.4196    3.3419    0.0000 O   0  0  0  0  0  0  0  0  0  0  0  0
  2  3  2  0      
  4  5  2  0      
  6  1  2  0      
  3  7  1  0      
  8  6  1  1      
  8  9  1  0      
  9 10  1  0      
 10 11  1  0      
 11 12  1  0      
 12 13  1  0      
 12 14  2  0      
 15 16  1  0      
 16 17  1  0      
 18 19  1  0      
 19 15  1  0      
 15 13  1  1      
 19 20  2  0      
 18 21  1  0      
 21 22  1  0      
 22 23  1  0      
 23 24  1  0      
 22 25  2  0      
 26 27  2  0      
 27 28  1  0      
 28 29  2  0      
 29 30  1  0      
 30 31  2  0      
 31 26  1  0      
 21 28  1  1      
 31 32  1  0      
 16 33  1  6      
  1  2  1  0      
  3  4  1  0      
  6  5  1  0      
 34 35  1  0      
 35 36  1  0      
 36 37  1  0      
 11 34  1  6      
  8 38  1  0      
 38 39  1  0      
 39 40  2  0      
 39 41  1  0      
 41 42  1  0      
 42 43  1  0      
 42 44  1  1      
 41 45  1  6      
 45 46  1  0      
 46 47  1  0      
 47 48  1  0      
 46 49  2  0      
 48 50  1  0      
 50 51  1  0      
 51 52  2  0      
 52 53  1  0      
 53 54  2  0      
 54 55  1  0      
 55 56  1  0      
 56 57  1  0      
 57 58  1  0      
 58 59  1  0      
 59 60  1  0      
 59 61  1  0      
  9 62  2  0      
 50 63  2  0      
 47 64  1  6      
 24 65  1  0      
 67 68  2  0      
 69 70  2  0      
 71 66  2  0      
 66 67  1  0      
 68 69  1  0      
 71 70  1  0      
 24 67  1  6      
 70 72  1  0      
 65 73  1  0      
 74 75  1  0      
 75 76  1  0      
 76 77  1  0      
 75 73  1  1      
 65 78  2  0      
 74 79  2  0      
 74 80  1  0      
 76 81  1  1      
 43 82  1  0      
 82 83  1  0      
 83 84  1  0      
 84 85  1  0      
 85 86  1  0      
 82 87  2  0      
 89 90  2  0      
 91 92  2  0      
 93 88  2  0      
 89 88  1  0      
 93 92  1  0      
 90 91  1  0      
 90 94  1  0      
 86 95  1  0      
 83 93  1  1      
 85 96  2  0      
 95 97  1  0      
 97 98  1  0      
 86 99  1  1      
 97100  2  0      
 98101  1  0      
 98102  1  1      
102103  1  0      
103104  1  0      
103105  1  0      
105106  1  0      
106107  1  0      
104107  1  0      
107108  2  0      
101109  1  0      
109110  1  0      
110111  1  0      
111112  1  0      
112113  1  0      
109114  2  0      
113115  1  0      
115116  1  0      
112117  2  0      
119120  2  0      
121122  2  0      
123118  2  0      
118119  1  0      
120121  1  0      
123122  1  0      
113123  1  1      
116124  1  0      
124125  1  0      
116126  2  0      
125127  1  0      
127128  1  0      
128129  1  0      
129130  1  0      
130131  1  0      
127132  2  0      
134135  2  0      
136137  2  0      
138133  2  0      
133134  1  0      
135136  1  0      
138137  1  0      
128138  1  1      
130139  2  0      
124140  1  1      
140141  1  0      
 80142  1  0      
142143  1  0      
131144  1  0      
144143  1  0      
143145  2  0      
142146  1  6      
146147  1  0      
147148  1  0      
148149  1  0      
149150  1  0      
150151  1  0      
150152  2  0      
131153  1  6      
153154  1  0      
154155  1  0      
155156  1  0      
154157  1  0      
157158  1  0      
156158  1  0      
158159  2  0      
135160  1  0      
121161  1  0      
120162  1  0      
119163  1  0      
164165  2  0      
164166  1  0      
 64164  1  0      
M  STY  1   1 SUP
M  SLB  1   1   1
M  SAL   1  3 164 165 166
M  SBL   1  1 174
M  SMT   1 COOH
M  SBV   1174  -10.6321    7.3587
M  END
