# Supplementary material
Source: MDPI journal article supplement (https://www.mdpi.com/1660-3397/11/10/3875)
Supplement: s4 [file s4]

marinedrugs-11-03875-s002.mol
  ChemDraw11081308352D

 51 53  0  0  0  0  0  0  0  0999 V2000
   -3.7985    2.5979    0.0000 C   0  0  0  0  0  0  0  0  0  0  0  0
   -3.7985    1.7729    0.0000 C   0  0  0  0  0  0  0  0  0  0  0  0
   -3.0840    1.3604    0.0000 C   0  0  0  0  0  0  0  0  0  0  0  0
   -2.3695    1.7729    0.0000 C   0  0  0  0  0  0  0  0  0  0  0  0
   -2.3695    2.5979    0.0000 C   0  0  0  0  0  0  0  0  0  0  0  0
   -3.0840    3.0104    0.0000 C   0  0  0  0  0  0  0  0  0  0  0  0
   -1.6551    1.3604    0.0000 C   0  0  0  0  0  0  0  0  0  0  0  0
   -1.6551    3.0104    0.0000 C   0  0  0  0  0  0  0  0  0  0  0  0
   -0.9406    2.5979    0.0000 C   0  0  0  0  0  0  0  0  0  0  0  0
   -0.9406    1.7729    0.0000 C   0  0  0  0  0  0  0  0  0  0  0  0
   -0.2261    3.0104    0.0000 N   0  0  0  0  0  0  0  0  0  0  0  0
    0.4883    2.5979    0.0000 C   0  0  0  0  0  0  0  0  0  0  0  0
   -0.2261    1.3604    0.0000 Cl  0  0  0  0  0  0  0  0  0  0  0  0
    0.4883    1.7729    0.0000 C   0  0  0  0  0  0  0  0  0  0  0  0
   -1.6551    3.8354    0.0000 O   0  0  0  0  0  0  0  0  0  0  0  0
   -1.6551    0.5354    0.0000 O   0  0  0  0  0  0  0  0  0  0  0  0
    1.2028    3.0104    0.0000 O   0  0  0  0  0  0  0  0  0  0  0  0
    1.2028    1.3604    0.0000 C   0  0  0  0  0  0  0  0  0  0  0  0
    1.9997    1.5739    0.0000 C   0  0  0  0  0  0  0  0  0  0  0  0
    2.7142    1.1614    0.0000 C   0  0  0  0  0  0  0  0  0  0  0  0
    2.7142    0.3364    0.0000 C   0  0  0  0  0  0  0  0  0  0  0  0
    3.4286   -0.0761    0.0000 C   0  0  0  0  0  0  0  0  0  0  0  0
    3.2151   -0.8730    0.0000 C   0  0  0  0  0  0  0  0  0  0  0  0
    3.9296   -1.2855    0.0000 C   0  0  0  0  0  0  0  0  0  0  0  0
    4.1431   -2.0824    0.0000 C   0  0  0  0  0  0  0  0  0  0  0  0
    3.7306   -2.7968    0.0000 C   0  0  0  0  0  0  0  0  0  0  0  0
    2.9337   -3.0104    0.0000 C   0  0  0  0  0  0  0  0  0  0  0  0
    2.2193   -2.5979    0.0000 C   0  0  0  0  0  0  0  0  0  0  0  0
    1.5048   -3.0104    0.0000 C   0  0  0  0  0  0  0  0  0  0  0  0
    0.7903   -2.5979    0.0000 C   0  0  0  0  0  0  0  0  0  0  0  0
    0.0758   -3.0104    0.0000 C   0  0  0  0  0  0  0  0  0  0  0  0
   -0.6386   -2.5979    0.0000 C   0  0  0  0  0  0  0  0  0  0  0  0
   -1.3531   -3.0104    0.0000 C   0  0  0  0  0  0  0  0  0  0  0  0
   -2.0676   -2.5979    0.0000 C   0  0  0  0  0  0  0  0  0  0  0  0
   -3.0840    0.5354    0.0000 C   0  0  0  0  0  0  0  0  0  0  0  0
   -2.6715   -0.3309    0.0000 C   0  0  0  0  0  0  0  0  0  0  0  0
   -1.8746    0.0344    0.0000 C   0  0  0  0  0  0  0  0  0  0  0  0
   -2.6715   -1.2796    0.0000 C   0  0  0  0  0  0  0  0  0  0  0  0
   -2.0676   -1.7729    0.0000 C   0  0  0  0  0  0  0  0  0  0  0  0
    4.1431   -3.5113    0.0000 O   0  0  0  0  0  0  0  0  0  0  0  0
   -4.5130    3.0104    0.0000 C   0  0  0  0  0  0  0  0  0  0  0  0
    0.0758    1.0584    0.0000 C   0  0  0  0  0  0  0  0  0  0  0  0
   -4.5130    1.3604    0.0000 O   0  0  0  0  0  0  0  0  0  0  0  0
   -3.8809    0.3218    0.0000 O   0  0  0  0  0  0  0  0  0  0  0  0
   -1.3531   -1.3604    0.0000 C   0  0  0  0  0  0  0  0  0  0  0  0
   -2.7820   -3.0104    0.0000 O   0  0  0  0  0  0  0  0  0  0  0  0
    0.7903   -1.7729    0.0000 O   0  0  0  0  0  0  0  0  0  0  0  0
    4.5130   -0.7021    0.0000 O   0  0  0  0  0  0  0  0  0  0  0  0
    2.5006   -1.2855    0.0000 C   0  0  0  0  0  0  0  0  0  0  0  0
    2.9337   -3.8354    0.0000 C   0  0  0  0  0  0  0  0  0  0  0  0
   -1.3531   -3.8354    0.0000 C   0  0  0  0  0  0  0  0  0  0  0  0
  1  2  2  0      
  2  3  1  0      
  3  4  2  0      
  4  5  1  0      
  5  6  2  0      
  6  1  1  0      
  4  7  1  0      
  8  5  1  0      
  8  9  1  0      
  9 10  2  0      
  7 10  1  0      
  9 11  1  0      
 11 12  1  0      
 10 13  1  0      
 12 14  1  0      
  8 15  2  0      
  7 16  2  0      
 12 17  2  0      
 14 18  2  0      
 18 19  1  0      
 19 20  2  0      
 20 21  1  0      
 21 22  2  0      
 22 23  1  0      
 23 24  1  0      
 24 25  1  0      
 25 26  1  0      
 26 27  1  0      
 27 28  2  0      
 28 29  1  0      
 29 30  1  0      
 30 31  1  0      
 31 32  2  0      
 32 33  1  0      
 33 34  1  0      
  3 35  1  0      
 35 36  1  0      
 36 37  1  0      
 36 38  2  0      
 34 39  1  0      
 38 39  1  0      
 26 40  2  0      
  1 41  1  0      
 14 42  1  0      
  2 43  1  0      
 35 44  2  0      
 39 45  1  1      
 34 46  1  1      
 30 47  1  1      
 24 48  1  1      
 23 49  1  6      
 27 50  1  0      
 33 51  1  6      
M  END
