# Supplementary material for: Harnessing the Potential of Halogenated Natural Product Biosynthesis by Mangrove-Derived Actinomycetes
Source: MDPI journal article supplement (doi:10.3390/md11103875), 2013-10-14
Supplement: s6 [file s6]

marinedrugs-11-03875-s003.mol
  corina  11211301493D 1   1.00000     0.00000 
CORINA 3.49 0023  12.04.2013
 28 29  0  0  0  0  0  0  0  0999 V2000
    0.8425    1.7722   -2.7113 C   0  0  0  0  0  0  0  0  0  0  0  0
    0.7088    0.3982   -2.4956 C   0  0  0  0  0  0  0  0  0  0  0  0
    1.7974   -0.3399   -2.0933 C   0  0  0  0  0  0  0  0  0  0  0  0
    3.0337    0.2743   -1.8990 C   0  0  0  0  0  0  0  0  0  0  0  0
    3.1688    1.6389   -2.1082 C   0  0  0  0  0  0  0  0  0  0  0  0
    2.0811    2.3854   -2.5143 C   0  0  0  0  0  0  0  0  0  0  0  0
    4.0821   -0.4955   -1.5119 O   0  0  0  0  0  0  0  0  0  0  0  0
    5.2239    0.1599   -0.9585 C   0  0  0  0  0  0  0  0  0  0  0  0
    5.6216    1.3107   -1.8915 C   0  0  0  0  0  0  0  0  0  0  0  0
    4.4876    2.3389   -1.8965 C   0  0  0  0  0  0  0  0  0  0  0  0
   -0.3186    2.5703   -3.1512 C   0  0  0  0  0  0  0  0  0  0  0  0
   -1.5115    1.9739   -3.3458 N   0  0  0  0  0  0  0  0  0  0  0  0
   -0.1989    3.7657   -3.3380 O   0  0  0  0  0  0  0  0  0  0  0  0
   -2.6639    2.7661   -3.7824 C   0  0  0  0  0  0  0  0  0  0  0  0
   -2.6453    2.8961   -5.3068 C   0  0  0  0  0  0  0  0  0  0  0  0
   -3.8489    3.7234   -5.7627 C   0  0  0  0  0  0  0  0  0  0  0  0
   -1.4392    3.5449   -5.7148 O   0  0  0  0  0  0  0  0  0  0  0  0
    5.8240    0.8103   -3.2146 O   0  0  0  0  0  0  0  0  0  0  0  0
    6.3821   -0.8332   -0.8428 C   0  0  0  0  0  0  0  0  0  0  0  0
    4.8794    0.7141    0.4253 C   0  0  0  0  0  0  0  0  0  0  0  0
    5.9712   -1.9920    0.0678 C   0  0  0  0  0  0  0  0  0  0  0  0
    7.1120   -2.9701    0.1818 C   0  0  0  0  0  0  0  0  0  0  0  0
    6.9179   -4.2371   -0.0886 C   0  0  0  0  0  0  0  0  0  0  0  0
    5.5275   -4.7418   -0.3766 C   0  0  0  0  0  0  0  0  0  0  0  0
    8.0852   -5.1900   -0.1117 C   0  0  0  0  0  0  0  0  0  0  0  0
   -3.9358    2.0819   -3.3521 C   0  0  0  0  0  0  0  0  0  0  0  0
   -3.8849    1.0396   -2.7432 O   0  0  0  0  0  0  0  0  0  0  0  0
   -5.1253    2.6305   -3.6452 O   0  0  0  0  0  0  0  0  0  0  0  0
  1  2  2  0      
  2  3  1  0      
  3  4  2  0      
  4  5  1  0      
  5  6  2  0      
  6  1  1  0      
  4  7  1  0      
  7  8  1  0      
  8  9  1  0      
  9 10  1  0      
 10  5  1  0      
  1 11  1  0      
 11 12  1  0      
 11 13  2  0      
 14 12  1  0      
 14 15  1  0      
 15 16  1  0      
 15 17  1  0      
  9 18  1  0      
  8 19  1  0      
  8 20  1  0      
 19 21  1  0      
 21 22  1  0      
 22 23  2  0      
 23 24  1  0      
 23 25  1  0      
 14 26  1  0      
 26 27  2  0      
 26 28  1  0      
M  STY  1   1 SUP
M  SLB  1   1   1
M  SAL   1  3  26  27  28
M  SBL   1  1  27
M  SMT   1 COOH
M  SBV   1 27   -7.1450    7.9303
M  END
$$$$
