# Supplementary material for: Harnessing the Potential of Halogenated Natural Product Biosynthesis by Mangrove-Derived Actinomycetes
Source: MDPI journal article supplement (doi:10.3390/md11103875), 2013-10-14
Supplement: s7 [file s7]

marinedrugs-11-03875-s003.mol
  ChemDraw11081308352D

 28 29  0  0  0  0  0  0  0  0999 V2000
   -1.8782   -0.3197    0.0000 C   0  0  0  0  0  0  0  0  0  0  0  0
   -1.8782   -1.1447    0.0000 C   0  0  0  0  0  0  0  0  0  0  0  0
   -1.1637   -1.5572    0.0000 C   0  0  0  0  0  0  0  0  0  0  0  0
   -0.4493   -1.1447    0.0000 C   0  0  0  0  0  0  0  0  0  0  0  0
   -0.4493   -0.3197    0.0000 C   0  0  0  0  0  0  0  0  0  0  0  0
   -1.1637    0.0928    0.0000 C   0  0  0  0  0  0  0  0  0  0  0  0
    0.2652   -1.5572    0.0000 O   0  0  0  0  0  0  0  0  0  0  0  0
    0.9797   -1.1447    0.0000 C   0  0  0  0  0  0  0  0  0  0  0  0
    0.9797   -0.3197    0.0000 C   0  0  0  0  0  0  0  0  0  0  0  0
    0.2652    0.0928    0.0000 C   0  0  0  0  0  0  0  0  0  0  0  0
   -2.5927    0.0928    0.0000 C   0  0  0  0  0  0  0  0  0  0  0  0
   -2.5927    0.9178    0.0000 N   0  0  0  0  0  0  0  0  0  0  0  0
   -3.3071   -0.3197    0.0000 O   0  0  0  0  0  0  0  0  0  0  0  0
   -3.1231    1.5572    0.0000 C   0  0  0  0  0  0  0  0  0  0  0  0
   -3.8376    1.1447    0.0000 C   0  0  0  0  0  0  0  0  0  0  0  0
   -4.0511    0.3478    0.0000 C   0  0  0  0  0  0  0  0  0  0  0  0
   -4.5520    1.5572    0.0000 O   0  0  0  0  0  0  0  0  0  0  0  0
    1.6942    0.0928    0.0000 O   0  0  0  0  0  0  0  0  0  0  0  0
    1.6942   -1.5572    0.0000 C   0  0  0  0  0  0  0  0  0  0  0  0
    0.9797   -1.9697    0.0000 C   0  0  0  0  0  0  0  0  0  0  0  0
    2.4086   -1.1447    0.0000 C   0  0  0  0  0  0  0  0  0  0  0  0
    3.1231   -1.5572    0.0000 C   0  0  0  0  0  0  0  0  0  0  0  0
    3.8376   -1.1447    0.0000 C   0  0  0  0  0  0  0  0  0  0  0  0
    4.5520   -1.5572    0.0000 C   0  0  0  0  0  0  0  0  0  0  0  0
    3.8376   -0.3197    0.0000 C   0  0  0  0  0  0  0  0  0  0  0  0
   -3.1231    1.9697    0.0000 C   0  0  0  0  0  0  0  0  0  0  0  0
   -2.4086    1.5572    0.0000 O   0  0  0  0  0  0  0  0  0  0  0  0
   -3.8376    1.5572    0.0000 O   0  0  0  0  0  0  0  0  0  0  0  0
  1  2  2  0      
  2  3  1  0      
  3  4  2  0      
  4  5  1  0      
  5  6  2  0      
  6  1  1  0      
  4  7  1  0      
  7  8  1  0      
  8  9  1  0      
  9 10  1  0      
 10  5  1  0      
  1 11  1  0      
 11 12  1  0      
 11 13  2  0      
 14 12  1  1      
 14 15  1  0      
 15 16  1  0      
 15 17  1  1      
  9 18  1  6      
  8 19  1  6      
  8 20  1  1      
 19 21  1  0      
 21 22  1  0      
 22 23  2  0      
 23 24  1  0      
 23 25  1  0      
 14 26  1  0      
 26 27  2  0      
 26 28  1  0      
M  STY  1   1 SUP
M  SLB  1   1   1
M  SAL   1  3  26  27  28
M  SBL   1  1  27
M  SMT   1 COOH
M  SBV   1 27   -7.1450    7.9303
M  END
